# Supplementary material
Source: MDPI journal article supplement (https://www.mdpi.com/2673-9976/24/1/14)

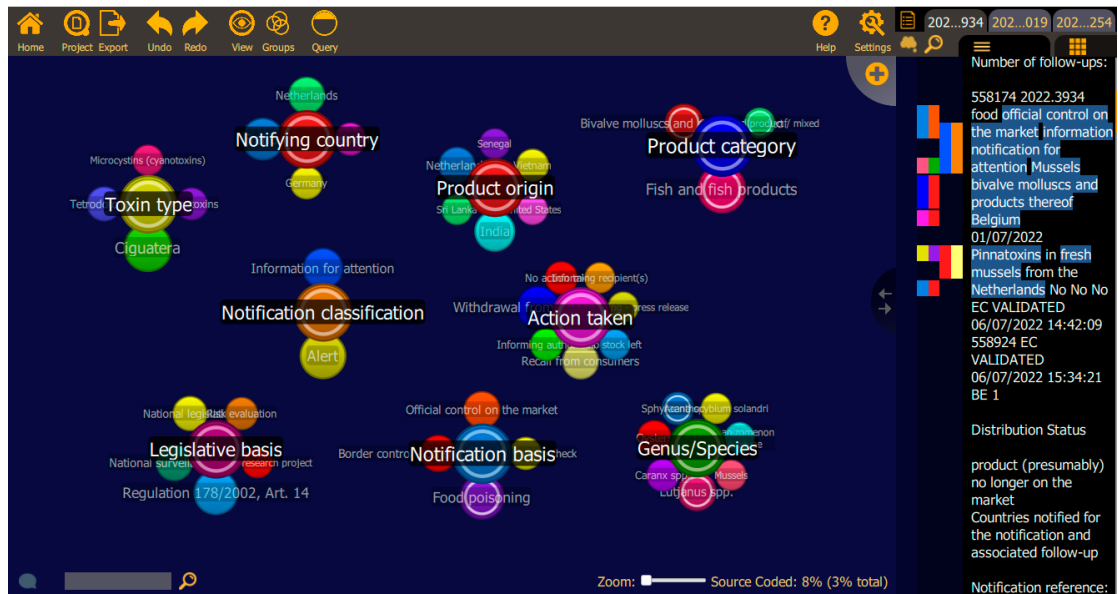

**Figure S1:** Quirkos 2.5.3 software: Developed hierarchies of themes and codes.

Supplement: s1 [file s1 › blsf-2795135-supplementary.pdf]
